# Supplementary material for: Rapid Authentication and Detection of Olive Oil Adulteration Using Laser-Induced Breakdown Spectroscopy
Source: MDPI journal article supplement (doi:10.3390/molecules28247960), 2023-12-05
Supplement: s1 [file s1]

# Rapid Authentication and Detection of Olive Oil Adulteration using Laser-Induced Breakdown Spectroscopy

Eleni Nanou <sup>1,2</sup>, Nefeli Pliatsika <sup>1,2</sup> and Stelios Couris <sup>1,2,\*</sup>

<sup>1</sup> Department of Physics, University of Patras, 26504 Patras, Greece; e.nanou@iceht.forth.gr (E.N.); n.pliatsika@iceht.forth.gr (N.P.)

<sup>2</sup> Institute of Chemical Engineering Sciences (ICE-HT), Foundation for Research and Technology-Hellas (FORTH), 26504 Patras, Greece

\* Correspondence: couris@upatras.gr; Tel.: +30-2610996086

**Table S1.** Confusion matrices obtained via external validation by the SVMs/LR/GB algorithms.

| SVMs/LR/GB algorithms |                   |               |             |             |             |             |               |
|-----------------------|-------------------|---------------|-------------|-------------|-------------|-------------|---------------|
| Geographical origin   | Predicted classes |               |             |             |             |             |               |
|                       |                   |               | EVOOs       | Corn oil    | Pomace oil  | Soybean oil | Sunflower oil |
| All regions           | Actual classes    | EVOOs         | 240/240/238 | 0/0/0       | 0/0/2       | 0/0/0       | 0/0/0         |
|                       |                   | Corn oil      | 0/0/0       | 218/199/211 | 21/31/17    | 1/7/8       | 0/3/4         |
|                       |                   | Pomace oil    | 0/0/0       | 12/20/19    | 214/206/203 | 8/11/7      | 6/3/11        |
|                       |                   | Soybean oil   | 0/0/1       | 4/8/1       | 11/16/15    | 218/200/205 | 7/16/18       |
|                       |                   | Sunflower oil | 0/0/0       | 5/1/3       | 2/1/7       | 17/14/30    | 216/224/200   |
| Crete                 | Actual classes    | EVOOs         | 60/60/56    | 0/0/0       | 0/0/0       | 0/0/3       | 0/0/1         |
|                       |                   | Corn oil      | 0/0/0       | 60/60/53    | 0/0/0       | 0/0/0       | 0/0/7         |
|                       |                   | Pomace oil    | 0/0/0       | 0/0/5       | 59/59/52    | 0/0/1       | 1/1/2         |
|                       |                   | Soybean oil   | 0/0/0       | 0/0/0       | 0/0/0       | 60/60       | 0/0/0         |
|                       |                   | Sunflower oil | 0/0/0       | 0/0/3       | 3/1/0       | 0/0/a       | 57/59/53      |
| Lesvos                | Actual classes    | EVOOs         | 60/60/59    | 0/0/1       | 0/0/0       | 0/0/0       | 0/0/0         |
|                       |                   | Corn oil      | 1/0/0       | 57/57/52    | 2/3/8       | 0/0/0       | 0/0/0         |
|                       |                   | Pomace oil    | 0/0/0       | 1/1/4       | 59/59/56    | 0/0/0       | 0/0/0         |
|                       |                   | Soybean oil   | 0/0/0       | 0/0/0       | 0/0/0       | 59/60/59    | 1/0/1         |
|                       |                   | Sunflower oil | 0/0/0       | 0/0/0       | 0/0/0       | 7/4/4       | 53/56/56      |
| Kalamata              | Actual classes    | EVOOs         | 60/60/57    | 0/0/3       | 0/0/0       | 0/0/0       | 0/0/0         |
|                       |                   | Corn oil      | 0/0/0       | 56/56/54    | 4/3/6       | 0/0/0       | 0/1/0         |
|                       |                   | Pomace oil    | 0/0/0       | 5/0/4       | 55/59/52    | 0/1/1       | 0/0/3         |

|               |                       |                      |                 |                 |                 |                 |                 |
|---------------|-----------------------|----------------------|-----------------|-----------------|-----------------|-----------------|-----------------|
|               |                       | <b>Soybean oil</b>   | 0/0/0           | 0/0/0           | 0/0/2           | <b>58/56/54</b> | 2/4/4           |
|               |                       | <b>Sunflower oil</b> | 0/0/0           | 0/0/3           | 1/0/1           | 3/7/8           | <b>56/53/48</b> |
| <b>Achaia</b> | <b>Actual classes</b> | <b>EVOOs</b>         | <b>60/60/59</b> | 0/0/0           | 0/0/0           | 0/0/0           | 0/0/1           |
|               |                       | <b>Corn oil</b>      | 0/0/1           | <b>60/60/55</b> | 0/0/4           | 0/0/0           | 0/0/0           |
|               |                       | <b>Pomace oil</b>    | 0/0/0           | 0/0/0           | <b>55/53/51</b> | 5/7/9           | 0/0/0           |
|               |                       | <b>Soybean oil</b>   | 0/0/2           | 0/0/1           | 2/3/9           | <b>55/55/43</b> | 3/2/5           |
|               |                       | <b>Sunflower oil</b> | 0/0/0           | 0/0/0           | 1/0/0           | 1/2/2           | <b>58/58/58</b> |

**Table S2.** Number of EVOOs per geographical region and mixtures with lower quality oils.

| <b>Geographical origin</b> | <b>EVOOs</b> | <b>Adulterant</b>                         | <b>No. of Adulteration samples</b> | <b>Total No. of samples</b> |
|----------------------------|--------------|-------------------------------------------|------------------------------------|-----------------------------|
| <b>Crete</b>               | 10           | Corn                                      | 9                                  | 46                          |
|                            |              | Pomace                                    | 9                                  |                             |
|                            |              | Soybean                                   | 9                                  |                             |
|                            |              | Sunflower                                 | 9                                  |                             |
| <b>Lesvos</b>              | 10           | Corn                                      | 9                                  | 46                          |
|                            |              | Pomace                                    | 9                                  |                             |
|                            |              | Soybean                                   | 9                                  |                             |
|                            |              | Sunflower                                 | 9                                  |                             |
| <b>Kalamata</b>            | 10           | Corn                                      | 9                                  | 46                          |
|                            |              | Pomace                                    | 9                                  |                             |
|                            |              | Soybean                                   | 9                                  |                             |
|                            |              | Sunflower                                 | 9                                  |                             |
| <b>Achaia</b>              | 10           | Corn                                      | 9                                  | 46                          |
|                            |              | Pomace                                    | 9                                  |                             |
|                            |              | Soybean                                   | 9                                  |                             |
|                            |              | Sunflower                                 | 9                                  |                             |
| <b>All regions</b>         | 40           | Corn,<br>Pomace,<br>Soybean,<br>Sunflower | 144                                | 184                         |

**Table S3.** Number of samples/spectra used for training and testing, per geographical region and mixtures.

| Geographical origin | Classes   | Training Samples | Measurements | Training Spectra | Testing Samples | Measurements | Testing Spectra |
|---------------------|-----------|------------------|--------------|------------------|-----------------|--------------|-----------------|
| <b>Crete</b>        | EVOOs     | 8                | 30           | 240              | 2               | 30           | 60              |
|                     | Corn      | 7                | 30           | 210              | 2               | 30           | 60              |
|                     | Pomace    | 7                | 30           | 210              | 2               | 30           | 60              |
|                     | Soybean   | 7                | 30           | 210              | 2               | 30           | 60              |
|                     | Sunflower | 7                | 30           | 210              | 2               | 30           | 60              |
| <b>Lesvos</b>       | EVOOs     | 8                | 30           | 240              | 2               | 30           | 60              |
|                     | Corn      | 7                | 30           | 210              | 2               | 30           | 60              |
|                     | Pomace    | 7                | 30           | 210              | 2               | 30           | 60              |
|                     | Soybean   | 7                | 30           | 210              | 2               | 30           | 60              |
|                     | Sunflower | 7                | 30           | 210              | 2               | 30           | 60              |
| <b>Kalamata</b>     | EVOOs     | 8                | 30           | 240              | 2               | 30           | 60              |
|                     | Corn      | 7                | 30           | 210              | 2               | 30           | 60              |
|                     | Pomace    | 7                | 30           | 210              | 2               | 30           | 60              |
|                     | Soybean   | 7                | 30           | 210              | 2               | 30           | 60              |
|                     | Sunflower | 7                | 30           | 210              | 2               | 30           | 60              |
| <b>Achaia</b>       | EVOOs     | 8                | 30           | 240              | 2               | 30           | 60              |
|                     | Corn      | 7                | 30           | 210              | 2               | 30           | 60              |
|                     | Pomace    | 7                | 30           | 210              | 2               | 30           | 60              |
|                     | Soybean   | 7                | 30           | 210              | 2               | 30           | 60              |
|                     | Sunflower | 7                | 30           | 210              | 2               | 30           | 60              |
| <b>All regions</b>  | EVOOs     | 32               | 30           | 960              | 8               | 30           | 240             |
|                     | Corn      | 28               | 30           | 840              | 8               | 30           | 240             |
|                     | Pomace    | 28               | 30           | 840              | 8               | 30           | 240             |
|                     | Soybean   | 28               | 30           | 840              | 8               | 30           | 240             |
|                     | Sunflower | 28               | 30           | 840              | 8               | 30           | 240             |
